# Supplementary material
Source: Elsevier journal article supplement (https://www.sciencedirect.com/science/article/pii/S188558571830375X)
Supplement: mmc1 [file S188558571830375X:mmc1.pdf]

## SUPPLEMENTARY MATERIAL

**Table 1**

Clinical Characteristics in the Validation Cohort.

|                     |           |
|---------------------|-----------|
|                     | n = 124   |
| Age, y              | 81.3 ± 4  |
| Female sex          | 44 (35.4) |
| Previous MI         | 16 (12.9) |
| Previous PCI        | 8 (6.4)   |
| Previous CABG       | 2 (1.6)   |
| Hypertension        | 92 (74)   |
| Diabetes            | 45 (36.2) |
| Renal failure*      | 83 (67)   |
| Smoker              | 15 (12)   |
| Dyslipidemia        | 50 (40.3) |
| Atrial fibrillation | 13 (10.5) |
| Pain onset > 6 h    | 39 (31.4) |
| Anterior MI         | 60 (48.3) |
| LVEF, %             | 38.8 ± 14 |

CABG, coronary artery bypass graft; LVEF, left ventricular ejection fraction; MI, myocardial infarction; PCI, percutaneous coronary intervention.

The data are expressed as No. (%) or mean ± standard deviation.

\*Defined as a glomerular filtration rate < 60 mL/min and based on the first blood sample drawn after admission. Because renal function was not known immediately before the episode, it remained unclear whether it arose from acute or pre-existing chronic renal insufficiency. Most likely it was a combination of the 2 situations, which were both related to an adverse outcome.

**Table 2**

Angiographic and Procedural Characteristics in the Validation Cohort.

|                                              |             |
|----------------------------------------------|-------------|
|                                              | n = 124     |
| Radial access                                | 43 (34.6)   |
| Baseline TIMI 0-I                            | 102 (82.2)  |
| Diseased vessels                             | 2.09 ± 0.83 |
| Lesions treated                              | 1.33 ± 0.6  |
| Left main lesion                             | 14 (11.3)   |
| Left anterior descending lesion              | 56 (45)     |
| Multivessel disease                          | 90 (72.5)   |
| Bifurcation treated                          | 26 (20.9)   |
| Bifurcation with 2 stents                    | 4 (3.2)     |
| NC lesions treated in primary PCI procedures | 19 (15.3)   |
| NC lesions treated in staged PCI procedures  | 21 (16.9)   |
| NC lesions left untreated                    | 37 (29.8)   |
| Thrombus aspiration                          | 55 (44.3)   |
| DES                                          | 27 (21.8)   |
| Stent length                                 | 20.9 ± 6.9  |
| Stent diameter                               | 3.02 ± 0.4  |
| IVUS                                         | 4 (3.2)     |
| Final TIMI III                               | 87 (70)     |
| IABP                                         | 60 (48)     |
| Bivalirudin alone                            | 6 (4.8)     |
| Bivalirudin + IIb-IIIa inhibitors            | 0           |
| UFH alone                                    | 84 (67.7)   |
| UFH + IIb-IIIa inhibitors                    | 34 (27.4)   |

DAPT, dual antiplatelet therapy; DES, drug-eluting stent; IABP, intra-aortic balloon pump; IVUS, intravascular ultrasound; NC, nonculprit; PCI, percutaneous coronary intervention; TIMI, Thrombolysis in Myocardial Infarction; UFH, unfractionated heparin sodium.

The data are expressed as No. (%) or mean  $\pm$  standard deviation.
